# Supplementary material for: FLOURY ENDOSPERM7 encodes a regulator of starch synthesis and amyloplast development essential for peripheral endosperm development in rice
Source: PubMed Central journal article supplement (PMC4737065; doi:10.1093/jxb/erv469), 2015-11-24
Supplement: supp_erv469_Supplementary_material.pdf [file supp_erv469_Supplementary_material.pdf]

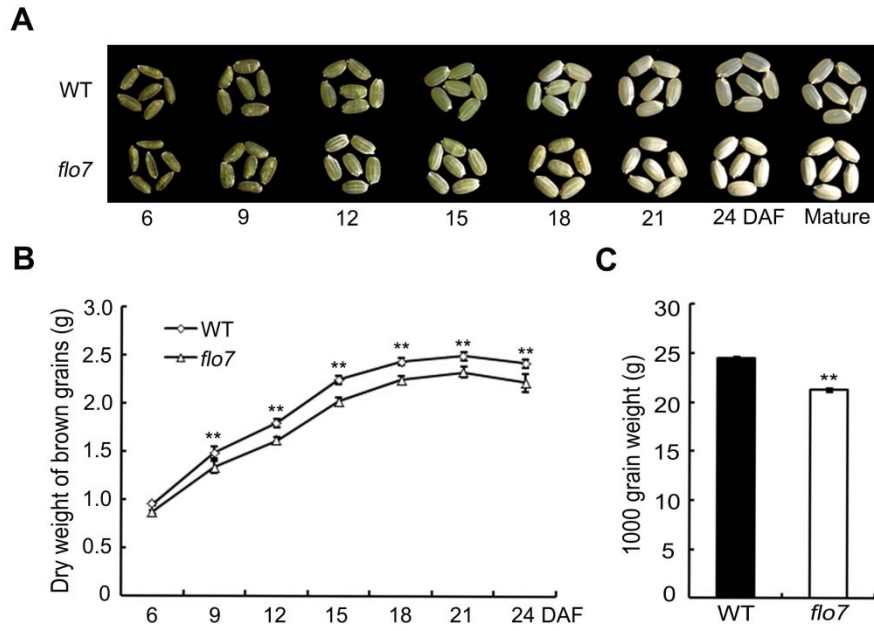

**Supplemental Figure S1. Time course analysis of the wild-type and *flo7* grain development.**

(A) Grain appearance of the wild-type and *flo7* mutant at series of growth stages as indicated. (B) Grain-filling process of the wild type and *flo7* mutant. Weight indicates the weight of 100 brown grains ( $n = 3$  each). (C) 1000-grain weight of wild type and *flo7* mutant ( $n = 3$  each). DAF, days after fertilization. Data are given as means  $\pm$  SD and were compared with wild type by Student's *t* test (\*\* $P < 0.01$ ).

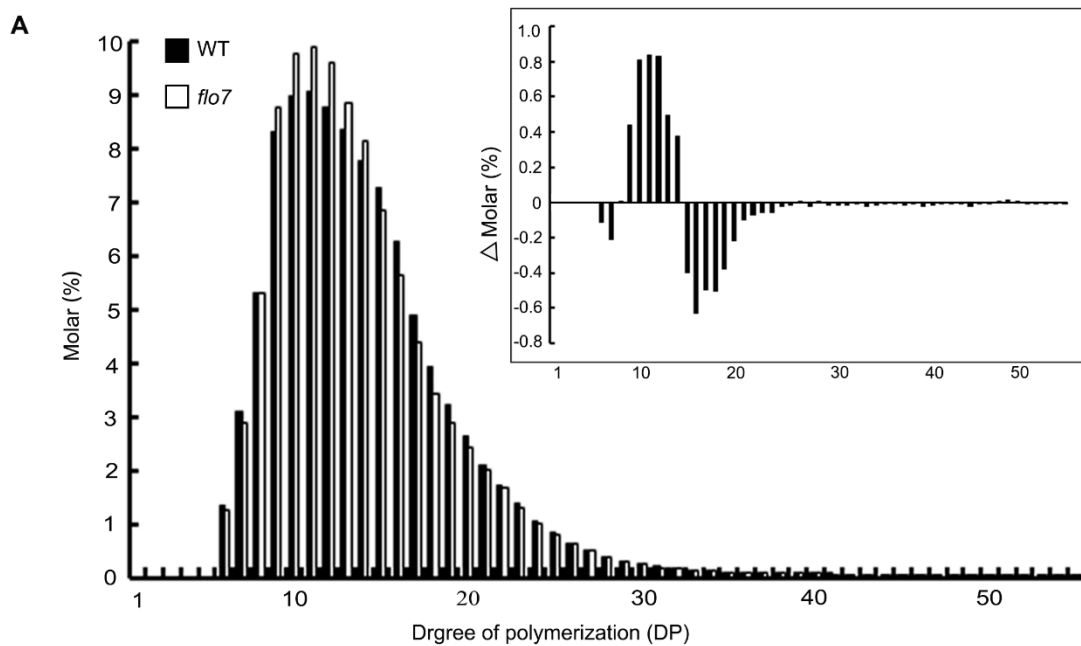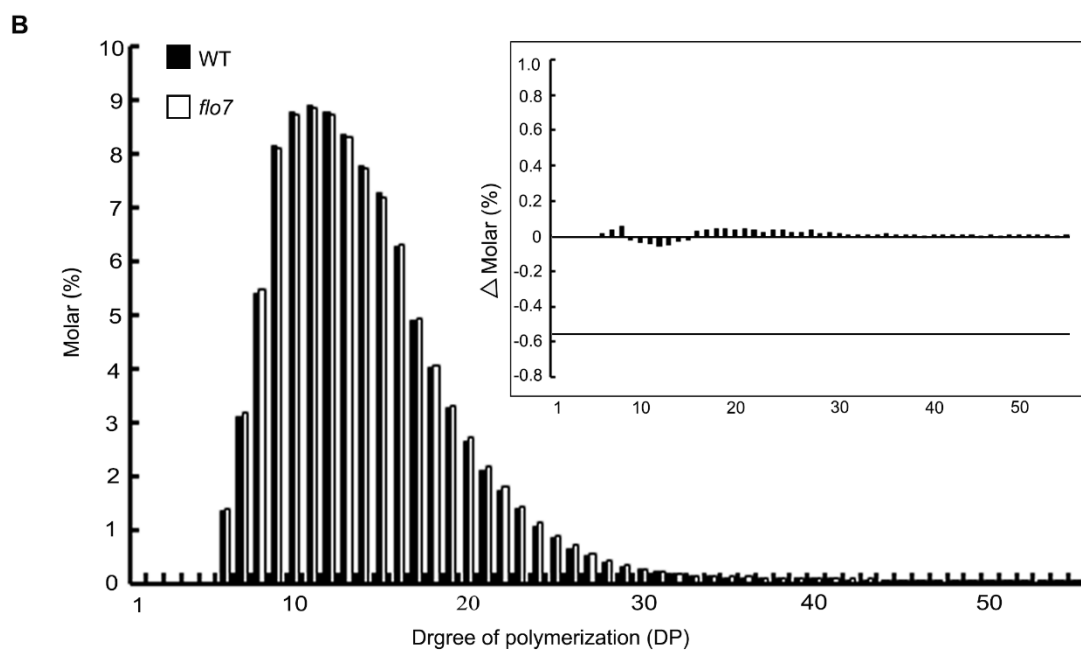

**Supplemental Figure S2.** Characterization of amylopectin chain length distribution difference between wild type and *flo7* mutant.

(A) Chain length distributions of amylopectin in the outer parts of endosperm from wild type and *flo7* mutant. (B) Chain length distributions of amylopectin in the inner parts of endosperm from wild type and *flo7* mutant. The inset graphs compare the chain length distribution patterns ( $\Delta$  molar %) between wild type and *flo7* mutant.

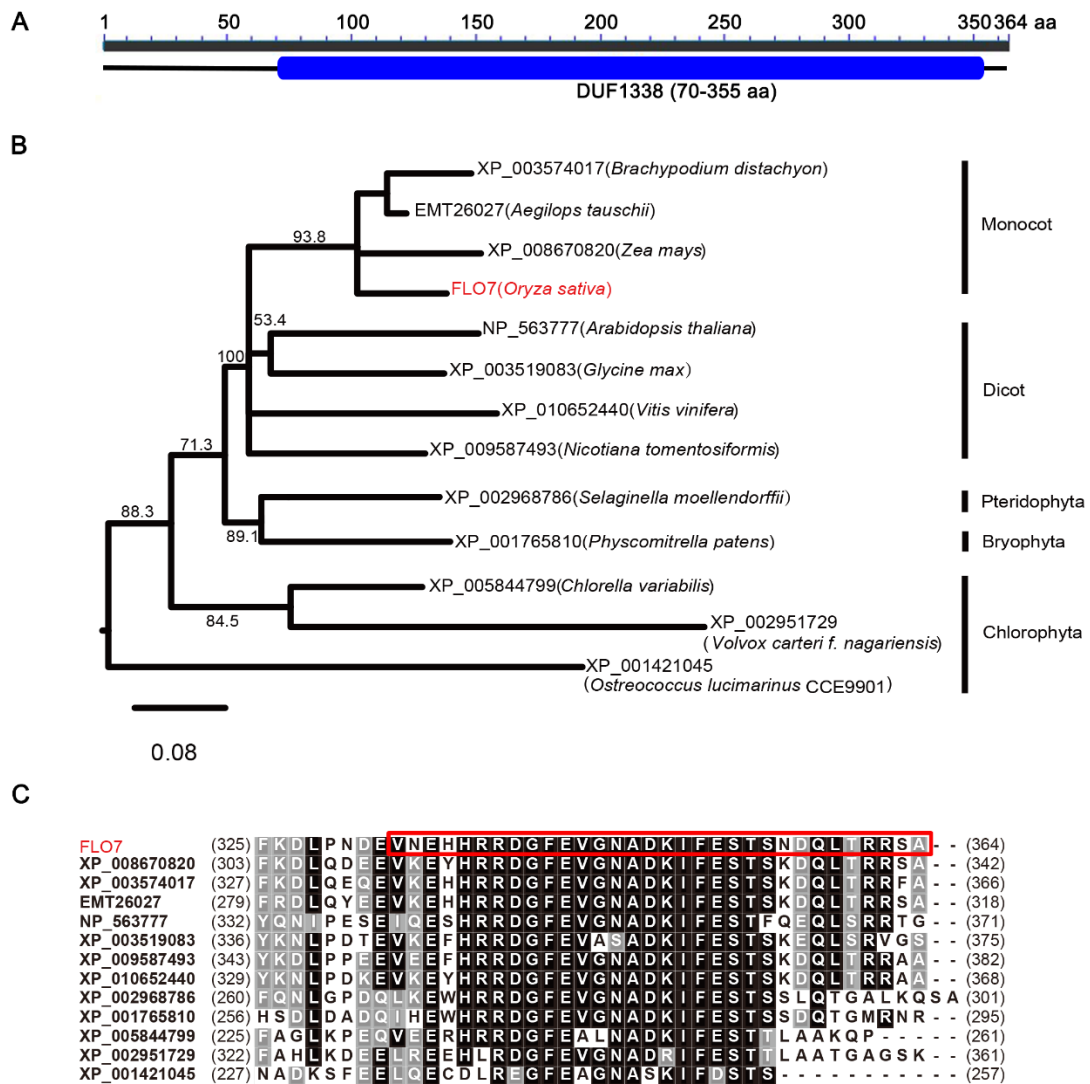

**Supplemental Figure S3.** Structure and phylogenetic analyses of FLO7 protein.

(A) Schematic domain structure of FLO7. (B) Phylogenetic analysis of FLO7 protein. The tree was derived from alignment of full-length amino acid sequences of FLO7 and its homologous genes from green algae to higher plants. FLO7 (*Oryza sativa*), XP\_003574017 (*Brachypodium distachyon*), XP\_008670820 (*Zea mays*) and EMT26027 (*Aegilops tauschii*) are representative proteins from monocot plants; NP\_563777 (*Arabidopsis thaliana*), XP\_003519083 (*Glycine max*), XP\_010652440 (*Vitis vinifera*) and XP\_009587493 (*Nicotiana tomentosiformis*) are representative proteins from dicot plants. XP\_002968786 (*Selaginella moellendorffii*) belongs to pteridophyte; XP\_001765810 (*Physcomitrella patens*) is from a bryophyte.

XP\_005844799 (*Chlorella variabilis*), XP\_001421045 (*Volvox carteri f.nagariensis*) and XP\_001421045 (*Ostreococcus lucimarinus* CCE9901) are from chlorophyta. All proteins are named according to their gene/EST names or NCBI accession numbers.

(C) Multiple amino acid sequence alignments of the C-terminal region of FLO7 proteins. Amino acid sequences were deduced from the orthologs of FLO7 and aligned using ClustalX software. Highly conserved residues are highlighted with black backgrounds. The FLO7 amino acid sequences in the red box indicate the deleted in *flo7* mutant protein.

MAVALAGARSPGAGAILSLRRLAPAAAAPVRLGGSGTPGTRRRRGIAMAAA  
ASAPPAPADALPKGADSFRTVISNMEKVYLSRNPTAKTILELVRSYDGDHI  
CYDHFAFRTFGVDGYGIKSLAEFFDFGYVPREELRFPKCLRALWFSPT  
NDGYTGTGVYGPLPRIFISELLVDELSPQSQDIIQKYIRTSGKGNKHATLAST  
SGELTWEKPIYSDFQVLSRESEYAAWTLVNGYALNHTTISTHRLISDIRSINK  
FNKFVEDNGFKLNSEGGILKVSPDGLLQQSSTVADSALFTFADGITESIPRSY  
IEFAERLVLPQFKDLPNDEVNEHHRDGFVGNADKIFESTSNDQLTRRSA

**Supplemental Figure S4.** Polypeptide sequences for FLO7 polyclonal antibodies production. Polypeptide sequences for polyclonal antibodies FLO7-C and FLO7-N generation are noted with blue font and red font, respectively. Amino acids in red box indicate the missing polypeptide sequence in *flo7* protein.

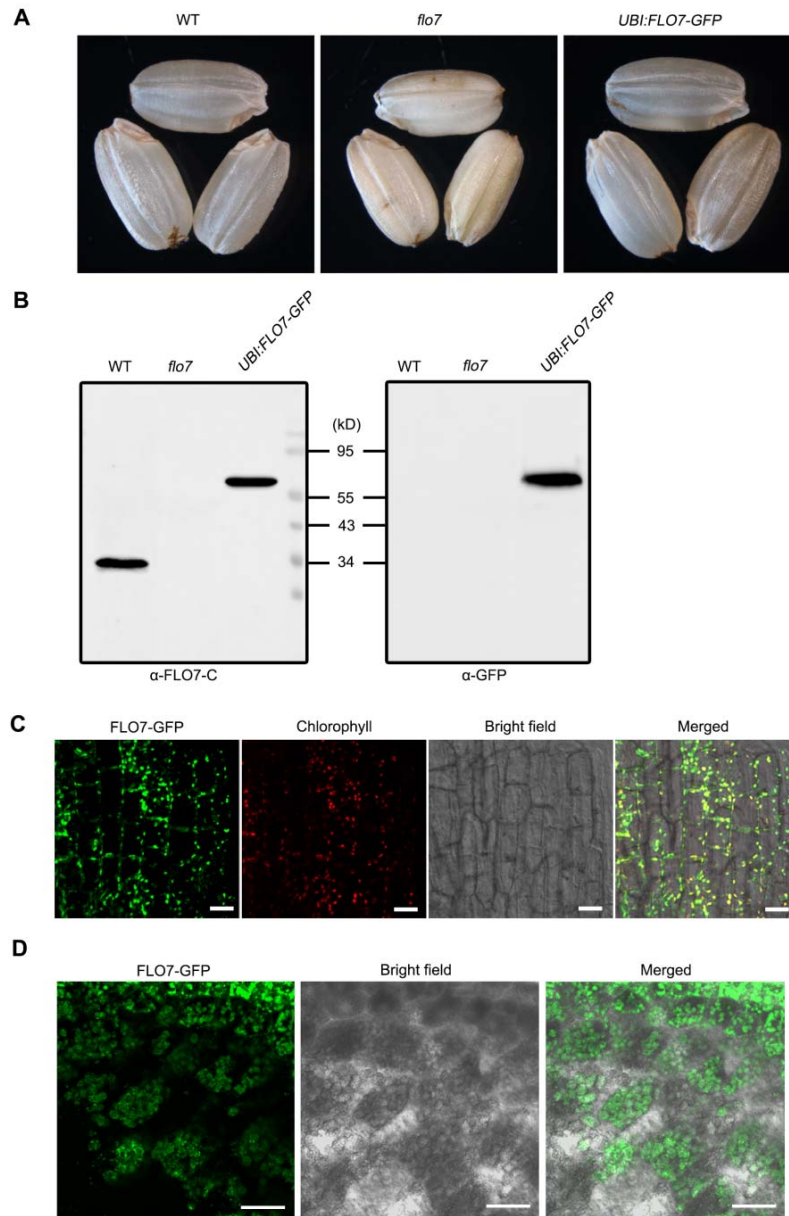

**Supplemental Figure S5.** Complementation of the *flo7* mutant phenotypes by *UBIQUITINI* promoter-driven FLO7-GFP.

(A) *UBIQUITINI* promoter-driven *FLO7-GFP* transgene rescued the grain phenotype of *flo7* mutant. (B) Western blot analysis showing that FLO7-C antibodies can specially detect the endogenous FLO7 and FLO7-GFP fusion proteins from transgenic fragment-positive lines. (C) Chloroplast localization of FLO7 proteins in leaf sheath cells from 5-day-old *FLO7-GFP* transgenic plants. Bars = 20  $\mu$ m. (D) Amyloplast localizations of FLO7-GFP in the periphery of the complemented transgenic *flo7* endosperm. Bars = 50  $\mu$ m.

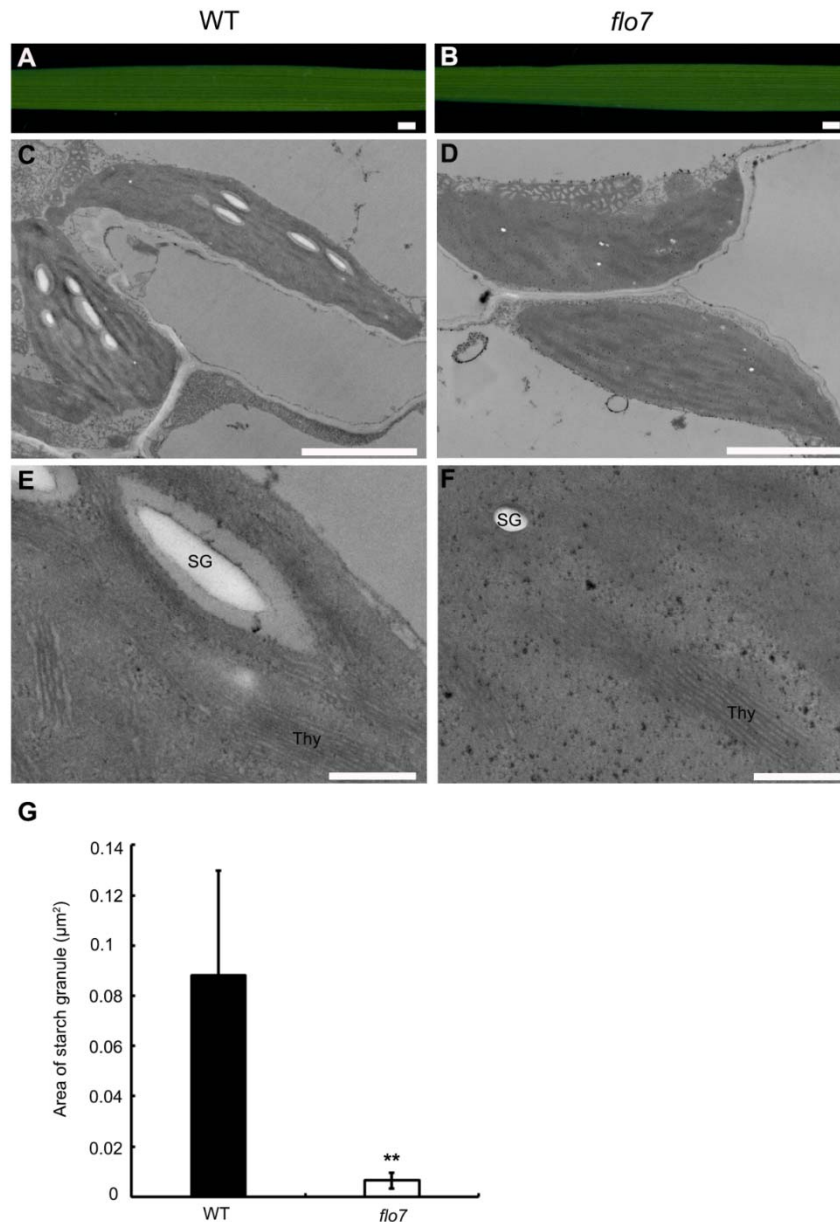

**Supplemental Figure S6.** Ultrastructure of chloroplasts in mesophyll cells of 2-week-old wild-type and *flo7* seedlings. (A, B) Third leaves from 2-week-old wild-type and *flo7* seedlings, respectively. Bars = 1 mm. (C, D) TEM images of chloroplasts of wild type and *flo7*, respectively. Bars = 2  $\mu\text{m}$ . (E, F) Magnified TEM images showing the SG as well as thylakoid and envelope membrane. SG, starch granule, Thy, thylakoid and envelope membrane. Bars = 200  $\mu\text{m}$ . (G) Quantitative comparison of starch granule areas in wild-type and *flo7* chloroplasts ( $n = 35$  each). Data are given as means  $\pm$  SD (from at least 3 independent samples) and are compared with wild type by Student's *t* test (\*\* $P < 0.01$ ).

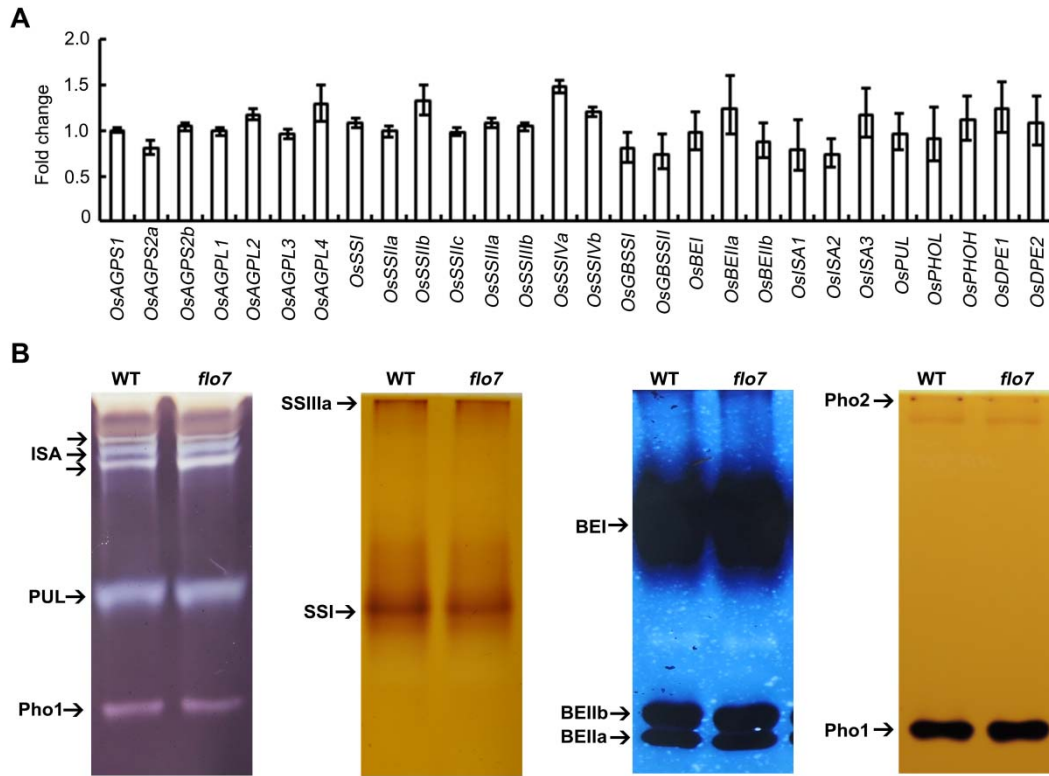

**Supplemental Figure S7.** Expression levels of the genes involved in production of storage starch as well as zymogram analysis of starch synthesizing enzymes.

(A) Expression Levels of the Genes involved in production of starch synthesis. (B) Zymogram analysis of starch synthesis enzymes.



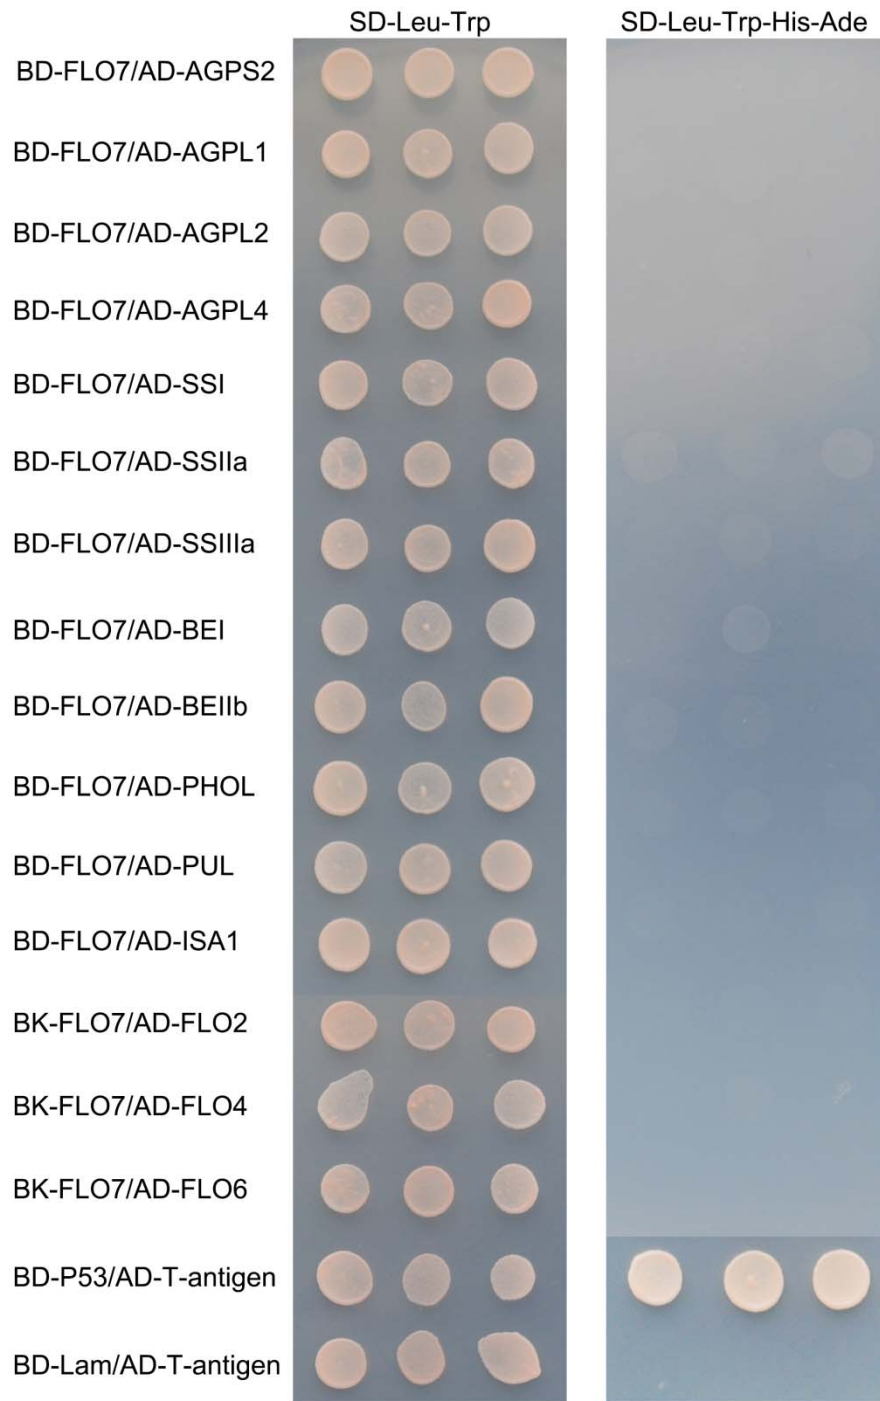

**Supplemental Figure S8.** Yeast two-hybrid assays between FLO7 and proteins involved in starch synthesis. Yeast two-hybrid assay showing that FLO7 did not interact with starch synthesis-related genes. BD-P53/AD-T-antigen was used as a positive control, while BD-Lam/AD-T-antigen was used as a negative control.

**Table S1.** Primers used in this study.

| Usage                              | Primer Name                                | Sequence (5' to 3')                         |
|------------------------------------|--------------------------------------------|---------------------------------------------|
| <b>Fine mapping</b>                | RM222-F                                    | CTTAAATGGGCCACATGCG                         |
|                                    | RM222-R                                    | CAAAGCTTCCGGCCAAAAG                         |
|                                    | RM271-F                                    | TCAGATCTACAATTCCATCC                        |
|                                    | RM271-R                                    | TCGGTGAGACCTAGAGAGCC                        |
|                                    | Z1-F                                       | AATGACAAGGCCGACGATAG                        |
|                                    | Z1-R                                       | TATTACCCAGGCCAACCTGT                        |
|                                    | Z3-F                                       | CTCAGTTGTTGGGGGATGAG                        |
|                                    | Z3-R                                       | CTTTGGAGATGTGCCAGAGA                        |
|                                    | Z5-F                                       | TTGATTACAACCAACTCTGACC                      |
|                                    | Z5-R                                       | CAATTGAGTAAGTCTGCTTGTGA                     |
|                                    | Z7-F                                       | GCGAGTGACAAAGGAGCA                          |
|                                    | Z7-R                                       | CCACCACTGTTGTCCCTAAT                        |
|                                    | Z10-F                                      | CATCTGCGGGTTGAGTGT                          |
|                                    | Z10-R                                      | TGACATTTCAAGTCTATTGGAC                      |
|                                    | Z15-F                                      | TTTTGATGATGCCTACTCCA                        |
|                                    | Z15-R                                      | GTAATTTGAAAAGCGTGCC                         |
|                                    | Z24-F                                      | GCGAGTGACAAAGGAGCA                          |
|                                    | Z24-R                                      | CCACCACTGTTGTCCCTAAT                        |
| <b>Genotyping</b>                  | InDel-F                                    | TGGTACTCCCACAGTTCAAAG                       |
|                                    | InDel-R                                    | AGAGAACACTCCTTCAATACGC                      |
|                                    | 2300K-F                                    | TTAATAACACATTGCGGACGT                       |
|                                    | 2300K-R                                    | GGATTGCACGCAGGTTCTC                         |
| <b>Binary vector construction</b>  | FLO7- 2300-Sma1-F                          | GTAGAAGAGGTACCCGGGTTTCGCCTCCAGTGCTCGC       |
|                                    | FLO7- 2300 -Sma1-R                         | CTCTAGAGGATCCCCGGGCACAGAGAACACTCCTTCAATACGC |
|                                    | FLO7-p35S-1305-GFP-SpeI-F                  | GCCCAGATCAACTAGTATGGCCGTGGCCCT              |
|                                    | FLO7- p35S -1305-GFP- BamHI -R             | TGCTCACCATGGATCCTGCAGATCTCCGTG              |
|                                    | flo7- p35S -1305-GFP- BamHI -R             | TGCTCACCATGGATCCAAACCATCGCGCCTC             |
|                                    | FLO7-pUbi-1305-GFP-SpeI-F                  | GGTACCTGCAACTAGTATGGCCGTGGCCCTTGCCGGCGC     |
|                                    | FLO7- pUbi -1305-GFP- SpeI -R              | CGGACTTAAGACTAGTTGCAGATCTCCGTGTAAGCTGAT     |
| <b>Transient expression assays</b> | PAN580-(1-69aa)-GFP-BamHI -F               | CGGTCCCGGGGATCCATGGCCGTGGCCCTTGCCGG         |
|                                    | PAN580-(1-69aa)-GFP-BamHI -R               | TGCTCACCATGGATCCAAATGAATCAGCACCC            |
|                                    | PAN580-(70-364aa)-GFP-BamHI -F             | CGGTCCCGGGGATCCCTTCGACAGTTATCTCAAACA        |
|                                    | PAN580-(70-364aa)-GFP-BamHI -R             | TGCTCACCATGGATCCTGCAGATCTCCGTGTAAGCT        |
|                                    | PAN580-(1-364aa)-GFP-BamHI -F              | CGGTCCCGGGGATCCATGGCCGTGGCCCTTGCCGG         |
|                                    | PAN580-(1-364aa)-GFP-BamHI -R              | TGCTCACCATGGATCCTGCAGATCTCCGTGTAAGCT        |
|                                    | PAN580- <i>flo7</i> (1-336aa)-GFP-BamHI -F | CGGTCCCGGGGATCCATGGCCGTGGCCCTTGCCGG         |
|                                    | PAN580- <i>flo7</i> (1-336aa)-GFP-BamHI -R | TGCTCACCATGGATCCAAACCATCGCGCCTC             |
|                                    | 35S-LUC-NcoI-F                             | AGATCGAATTCCATGGTCGTACCCCTACTCCAAAAATG      |
|                                    | FLO7-LUC-NcoI-R                            | TTGGCGTCTTCCATGGCTGCAGATCTCCGTG             |
|                                    | flo7-LUC-NcoI- R                           | TTGGCGTCTTCCATGGCAAACCATCGCGCCTC            |

|                                                         |             |                                           |
|---------------------------------------------------------|-------------|-------------------------------------------|
| <b>quantitative<br/>RT-PCR</b>                          | qRT-FLO7-F  | TTATGATGGGGACCACATTTGCTA                  |
|                                                         | qRT-FLO7-R  | AAACCTTAGTTCTTCACGAGGGACA                 |
|                                                         | qRT-Ubq-F   | ACCCTGGCTGACTACAACATC                     |
|                                                         | qRT-Ubq-R   | AGTTGACAGCCCTAGGGTG                       |
| <b>Yeast<br/>two-hybrid<br/>vector<br/>construction</b> | AD-AGPS1-F  | GGAGGCCAGTGAATTCATGGCGATGATGGCGATG        |
|                                                         | AD-AGPS1-R  | CGAGCTCGATGGATCCTATGACTGTTCCGCTAGGGATT    |
|                                                         | AD-AGPL1-F  | GGAGGCCAGTGAATTCATGCAGTTCAGCAGT           |
|                                                         | AD-AGPL1-R  | CGAGCTCGATGGATCCCCTATATGACCTTCCC          |
|                                                         | AD-AGPL2-F  | GGAGGCCAGTGAATTCATGCAATTCATGATG           |
|                                                         | AD-AGPL2-R  | CGAGCTCGATGGATCCCCTTATATGACGGTCCC         |
|                                                         | AD-AGPL4-F  | GGAGGCCAGTGAATTCATGGCGACCTGCTCG           |
|                                                         | AD-AGPL4-R  | CGAGCTCGATGGATCCCCTAGATAACTGTACC          |
|                                                         | AD-SSI-F    | GGAGGCCAGTGAATTCATGGCGACGGCGGCGGGGAT      |
|                                                         | AD-SSI-R    | CGAGCTCGATGGATCCTACTGTGAGGCGGCATGGTC      |
|                                                         | AD-SSIIa-F  | GGAGGCCAGTGAATTCATGTCGTCGGCCGTC           |
|                                                         | AD-SSIIa-R  | CGAGCTCGATGGATCCCCTACCATTGGTACTT          |
|                                                         | AD-SSIIIa-F | GGAGGCCAGTGAATTCATGGATTATTAGCATTGCA       |
|                                                         | AD-SSIIIa-R | CGAGCTCGATGGATCCAAATTTGTGAGCTGAATGG       |
|                                                         | AD-BEI-F    | GGAGGCCAGTGAATTCATGCTGTGTCTCACC           |
|                                                         | AD-BEI-R    | CGAGCTCGATGGATCCCCTATTGCAGTCTTC           |
|                                                         | AD-BEIIb-F  | GGAGGCCAGTGAATTCATGGCGGCGCCGGC            |
|                                                         | AD-BEIIb-R  | CGAGCTCGATGGATCCCCTCATTCCGCTGGA           |
|                                                         | AD-PHOL-F   | GGAGGCCAGTGAATTCATGAACTGGAATGCA           |
|                                                         | AD-PHOL-R   | CGAGCTCGATGGATCCCCTAGGGCAGGATGAC          |
|                                                         | AD-PUL-F    | GGAGGCCAGTGAATTCATGCAGATGCTGCTC           |
|                                                         | AD-PUL-R    | CGAGCTCGATGGATCCCCTCAACATCTAGGTT          |
|                                                         | AD-ISA1-F   | GGAGGCCAGTGAATTCATGGCGAGCCTCCCG           |
|                                                         | AD-ISA1-R   | CGAGCTCGATGGATCCATCATCAGGCTGCA            |
|                                                         | AD-FLO2-F   | GGAGGCCAGTGAATTCATGGCCCCAAGGGCGCCGGCC     |
|                                                         | AD-FLO2-R   | CGAGCTCGATGGATCCGCTGACAGAAGTGCAAATTGACT   |
|                                                         | AD-FLO4-F   | GGAGGCCAGTGAATTCATGCCGTCGGTTTCGAGGG       |
|                                                         | AD-FLO4-R   | CGAGCTCGATGGATCCGAGGAGCACCTGAGCTGCAG      |
|                                                         | AD-FLO6-F   | GGAGGCCAGTGAATTCATGCTCCCCCTCCTCCTCCC      |
|                                                         | AD-FLO6-R   | CGAGCTCGATGGATCCAGTGACAGTCAGAAGGTTGTT     |
|                                                         | BK-FLO7-F   | CATGGAGGCCGAATTCATGGCCGTGGCCCTTGCCGG      |
|                                                         | BK-FLO7-R   | TAGTTATGCGCCGCTGCAGGTTATGCAGATCTCCGTGTAAG |
| <b><i>In situ</i><br/>hybridization</b>                 | pGEM-FLO7-F | TCAGAGCCAGGACATCATTC                      |
|                                                         | pGEM-FLO7-R | GGAGACCATCAGGACTCACT                      |
